# Supplementary material for: Saccharomyces cerevisiae ASN1 and ASN2 are asparagine synthetase paralogs that have diverged in their ability to polymerize in response to nutrient stress
Source: PubMed Central journal article supplement (PMC6342913; doi:10.1038/s41598-018-36719-z), 2019-01-22
Supplement: 41598_2018_36719_MOESM1_ESM.pdf [file 41598_2018_36719_MOESM1_ESM.pdf]

## Supplementary Information

### ***Saccharomyces cerevisiae* ASN1 and ASN2 are asparagine synthetase paralogs that have diverged in their ability to polymerize in response to nutrient stress**

Chalongrat Noree<sup>1,\*</sup>, Naraporn Sirinonthanawech<sup>1</sup>, and James E. Wilhelm<sup>2,\*</sup>

<sup>1</sup>Institute of Molecular Biosciences, Mahidol University, 25/25 Phuttamonthon 4 Road, Salaya, Phuttamonthon, Nakhon Pathom 73170 Thailand

<sup>2</sup>Section of Cell and Developmental Biology, Division of Biological Sciences, University of California, San Diego, 9500 Gilman Drive (MC 0347), La Jolla, CA 92093-0347 USA

#### **\*Correspondence:**

Chalongrat Noree

Tel: +66-2-4419003

Fax: +66-2-4411013

Email: [chalongrat.nor@mahidol.edu](mailto:chalongrat.nor@mahidol.edu)

James E. Wilhelm

Tel: 1-858-534-9541

Fax: 1-858-534-7214

Email: [jwilhelm@ucsd.edu](mailto:jwilhelm@ucsd.edu)

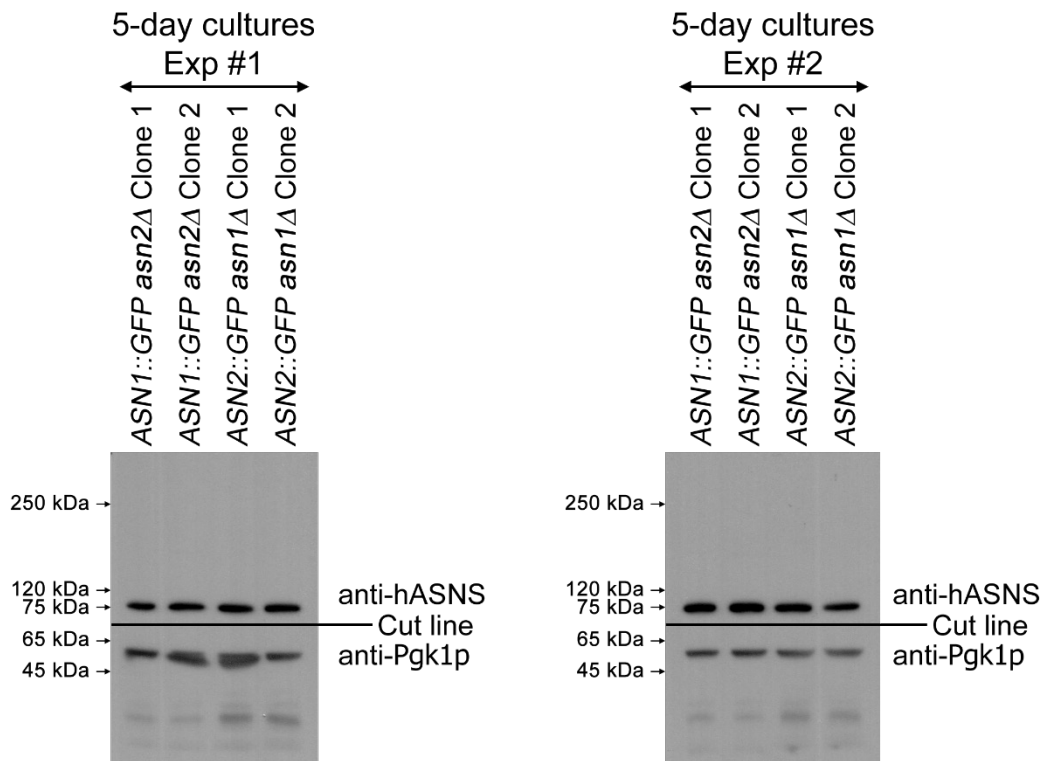

**Supplementary Figure S1. Expression levels of Asn1p-GFP (in *asn2Δ* background) vs. Asn2p-GFP (in *asn1Δ* background).** Two different clones of yeast *ASN1::GFP asn2Δ* and *ASN2::GFP asn1Δ* were grown in liquid YPD at 30°C for 5 days with shaking. Then, 10 OD<sub>600</sub> cells were taken from each culture to prepare whole cell extract for SDS-PAGE and western blot analysis. Each membrane was cut into 2 pieces between 75 and 65 kDa of the pre-stained protein ladder. The upper cuts were used to detect GFP-tagged Asn1/2p-GFP with anti-hASNS (91.7 kDa and 91.9 kDa, respectively). The lower cuts were used to detect Pgk1p (as internal loading control) (44.7 kDa). Both were later assembled and developed the chemiluminescent signal together. Two independent experiments performed to confirm the results.

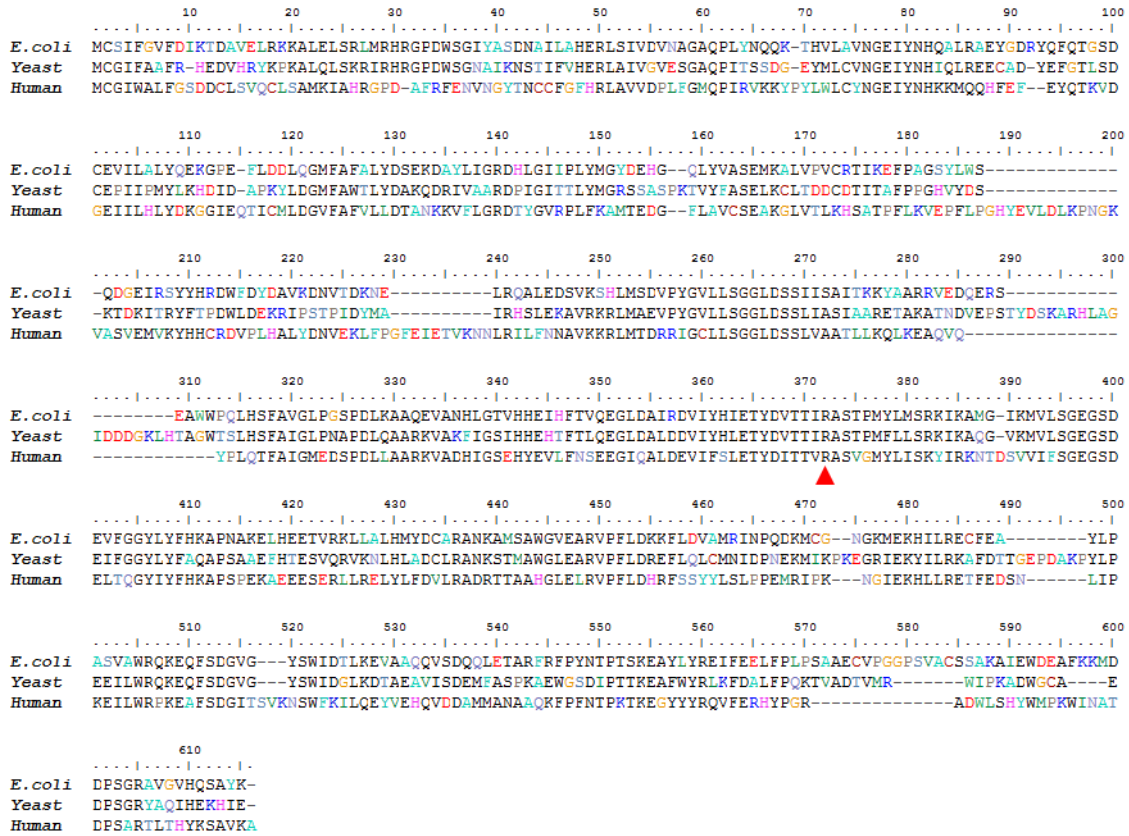

**Supplementary Figure S2. Amino acid sequence alignment of *E. coli*, yeast, and human asparagine synthetases.** Amino acid sequences of *E. coli* K12 asparagine synthetase B (P22106), yeast Asn1p (YPR145W, SGDID:S000006349), and human ASNS (P08243) were aligned. Yeast Asn1p shows: 37% identity and 53% similarity with human ASNS, and 48% identity and 64% similarity with *E. coli* asparagine synthetase B, respectively. The multiple alignment was performed with BioEdit version 7.1.9. The red arrow indicates arginine residue at position 325 of *E. coli*, 344 of yeast, and 340 of human asparagine synthetase, respectively.

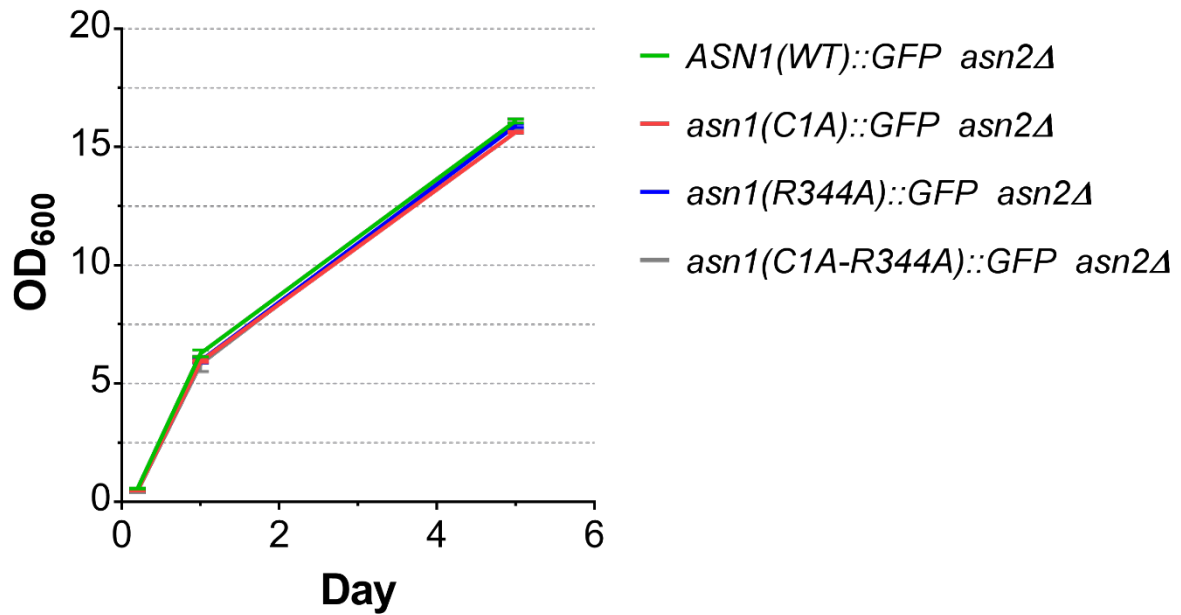

| Yeast strain                       | Clone # | OD <sub>600</sub> (Average ± SEM) |             |              |
|------------------------------------|---------|-----------------------------------|-------------|--------------|
|                                    |         | Log-phase                         | Day 1       | Day 5        |
| <i>ASN1(WT)::GFP asn2</i> Δ        | 1       | 0.57 ± 0.03                       | 6.29 ± 0.10 | 16.44 ± 0.27 |
|                                    | 2       | 0.57 ± 0.02                       | 6.27 ± 0.14 | 16.11 ± 0.09 |
| <i>asn1(C1A)::GFP asn2</i> Δ       | 1       | 0.47 ± 0.02                       | 5.94 ± 0.05 | 15.63 ± 0.04 |
|                                    | 2       | 0.46 ± 0.03                       | 5.90 ± 0.04 | 15.60 ± 0.12 |
| <i>asn1(R344A)::GFP asn2</i> Δ     | 1       | 0.49 ± 0.03                       | 5.96 ± 0.10 | 15.90 ± 0.06 |
|                                    | 2       | 0.54 ± 0.02                       | 6.23 ± 0.20 | 16.11 ± 0.22 |
| <i>asn1(C1A-R344A)::GFP asn2</i> Δ | 1       | 0.46 ± 0.07                       | 5.84 ± 0.33 | 15.99 ± 0.21 |
|                                    | 2       | 0.43 ± 0.07                       | 5.97 ± 0.05 | 16.05 ± 0.13 |

**Supplementary Figure S3. Growth curve comparison of yeast *ASN1(WT)::GFP asn2*Δ, *asn1(C1A)::GFP asn2*Δ, *asn1(R344A)::GFP asn2*Δ, and *asn1(C1A-R344A)::GFP asn2*Δ.** These yeast strains were cultured in YPD at 30°C, and measured their optical density (OD<sub>600</sub>) at exponential phase of growth, day 1, and day 5, respectively. Three independent experiments were performed and reported as average ± SEM. Clone#1 of each strain was used to make a growth curve. Summary table is shown below the growth curve.

```

      10      20      30      40      50      60      70      80      90     100
Asn1p  MCGIFAAFRHEDVHRYKPKALQLSKRIRHRGPDWSGNAIKNSTIFVHERLAIVGVESGAQPITSSDGEYMLCVNGEITYNHIQLREECADYEFGLSDCEP
Asn2p  MCGIFAAFRHEDIHNFKPKALQLSKRIRHRGPDWSGNAVNMNSTIFVHERLAIVGLDLSGAQPITSSADGEYMLGVNGEITYNHIQLREMCSDYKQTFSDCEP

      110     120     130     140     150     160     170     180     190     200
Asn1p  IIPMYLKHDIIDAPKYLDGMFAWILYDAKQDRIVAARDPIGITTILYMGRSSASPKIVYFASLKLCLTDDCDTITAFPPGHVYDSKTDKITRYFTPDWLDEK
Asn2p  IIPLYLEHDIIDAPKYLDGMFAFCLYDCKDRIVAARDPIGVVTLYMGRSSQSPETVYFASLKLCLTDVCDIISFPFPHVYDSETDKITRYFTPDWLDEK

      210     220     230     240     250     260     270     280     290     300
Asn1p  RIPSTPIDYMAIRHSLKAVRKRRLMAEVPYGVLLSGGLDSSLIASIAARETAKATNDV-EPSTYDSKARHLAGIDDDGKLHTAGWTSLSHFAIGLNPAD
Asn2p  RIPSTPVDYHAIRHSLKAVRKRRLMAEVPYGVLLSGGLDSSLIAAIAARETEKANADANEDNNVDEK--QLAGIDDDQGHHTSGWSRLHFAIGLNPAD

      310     320     330     340     350     360     370     380     390     400
Asn1p  LQAARKVAKFIGSIHHEHTFTLQEGLDALDDVIYHLETYDVTTIRASTPMFLLSRKIKAQGVKMLVLSGEGSDEIFGGYLYFAQAPSAAEFHTESVQRVKN
Asn2p  LQAARKVAKFIGSIHHEHTFTLQEGLDALDDVIYHLETYDVTTIRASTPMFLLSRKIKAQGVKMLVLSGEGSDEIFGGYLYFAQAPSAAEFHTESVQRVKN

      410     420     430     440     450     460     470     480     490     500
Asn1p  LHLADCLRANKSTMAWGLEARVPFLDREFLQLCMNIDPNEKMIKPKKEGRIEKYILRKAFTDTEGPDVAKPYLPEEILWRQKEQFSDGVGYSWIDGLRDTAE
Asn2p  LHLADCLRANKSTMAWGLEARVPFLDKDFLQLCMNIDPNEKMIKPKKEGRIEKYILRKAFTDTEGPDVAKPYLPEEILWRQKEQFSDGVGYSWIDGLRDTAE

      510     520     530     540     550     560     570
Asn1p  AVISDEMFAFPKAEWGSDIPTTKEAFWYRLKFDALFPQKIVADTVMRWIPKADWGCIEDPSGRYAQIHEKHIE-*
Asn2p  RAISDAMFANPKADWGDIDPTTKEAYWYRLKFDALFPQKTAADTVMRWIPKADWGCIEDPSGRYAKIHEKHVSA*

```

**Supplementary Figure S4. Pairwise amino acid sequence alignment of yeast asparagine synthetase paralogs.** The alignment of Asn1p (YPR145W, SGDID:S000006349) and Asn2p (YGR124W, SGDID:S000003356) shows 88% identity and 94% similarity of their amino acid sequences. The pairwise alignment (optimal GLOBAL) was performed with BioEdit version 7.1.9.

**A**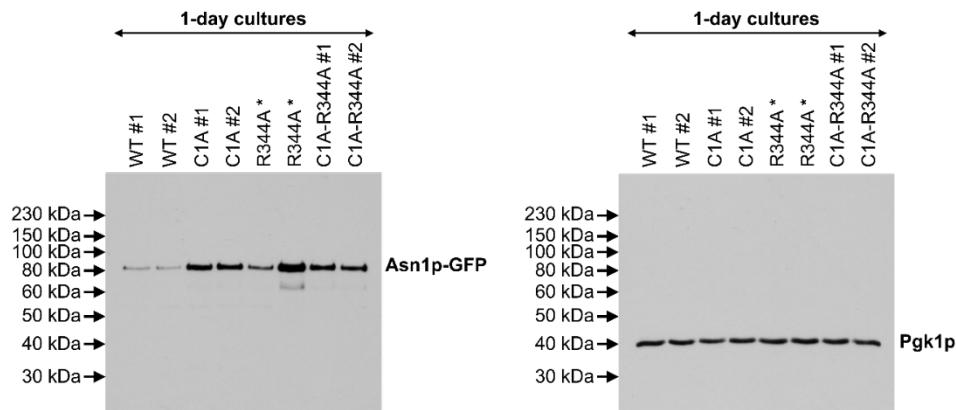**B**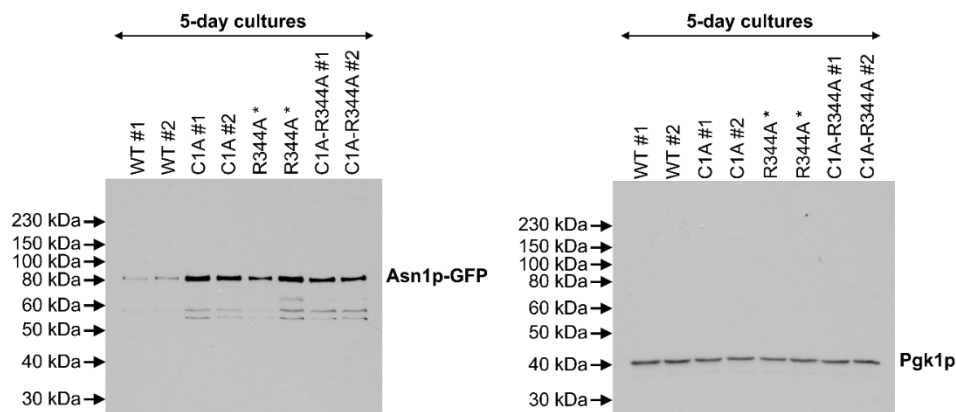**C**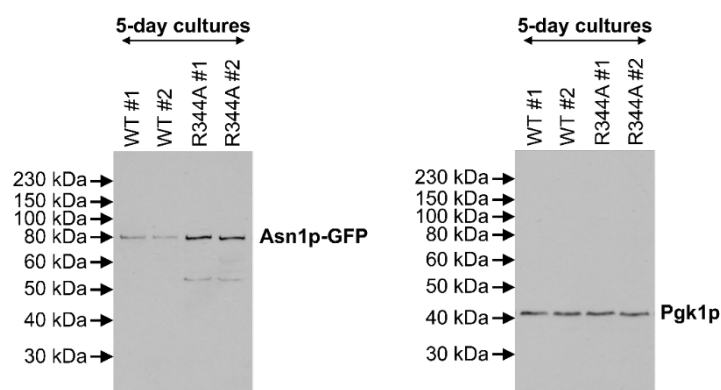

**Supplementary Figure S5. Defective structure formation of R344A and C1A-R344A Asn1p-GFP was not caused by their protein expression levels.** Yeast *ASN1(WT)::GFP asn2Δ*, *asn1(C1A)::GFP asn2Δ*, *asn1(R344A)::GFP asn2Δ*, and *asn1(C1A-R344A)::GFP asn2Δ* were grown in YPD for 1 day (**A**) and 5 days (**B-C**) at 30°C with shaking. Five OD<sub>600</sub> cells (1-day cultures) or 10 OD<sub>600</sub> cells (5-day cultures) were collected for preparing 200-μl whole cell extracts. Twenty μl of each protein sample were resolved on 8% acrylamide gel. Anti-hASNS antibody was used to detect Asn1p-GFP (91.75 kDa). Anti-PGK1 monoclonal antibody was used to detect yeast 3-phosphoglycerate kinase (44.74 kDa) as an internal loading control. Each experiment used the same blot for probing with anti-hASNS and anti-PGK1, one at a time. Stripping buffer [62.5 mM Tris-HCl pH 6.8, 2% (w/v) SDS, 0.7% (w/v) BME] was used

to remove previous antibody from the blot prior to addition of the other antibody. The clones of *asn1(R344A)::GFP asn2Δ*, marked with asterisk in **(A)** and **(B)**, were not used in this study as they showed unequal expression levels (although they both showed the Asn1p-GFP polymerization defect). The clones of *asn1(R344A)::GFP asn2Δ* used for analysis in this study were shown in **(C)**.

**Supplementary Table S1. List of primers used for recombinant DNA cloning, making DNA cassettes for yeast transformation, verifying yeast transformants, and DNA sequencing.**

| Primer Code                                                                                                                                                                                                                                                                                             | Sequence (5' to 3')                                                                       | Description                                                                                              | Used with | PCR Product Size |
|---------------------------------------------------------------------------------------------------------------------------------------------------------------------------------------------------------------------------------------------------------------------------------------------------------|-------------------------------------------------------------------------------------------|----------------------------------------------------------------------------------------------------------|-----------|------------------|
| <b>For creating yeast <i>ASN1::GFP ASN2::mCherry</i> (colocalization assay)</b><br>DNA cassette carrying (5' to 3'): 50 nt upstream of the <i>ASN2</i> stop codon, <i>mCherry</i> coding sequence, kanamycin resistance gene, and 50 nt downstream of the <i>ASN2</i> stop codon<br>DNA template: pBS34 |                                                                                           |                                                                                                          |           |                  |
| CN0033                                                                                                                                                                                                                                                                                                  | 5'-<br>AAGATCCTTCAGGTAGATACGCCAAAATACA<br>CGAAAAGCACGTCAAGTCTGGTTCGACGGAT<br>CCCCGGG -3'  | Forward, with 50 nt upstream of <i>ASN2</i> stop codon, sequence homology to pBS34 (underlined)          | JW1995    | 2,533 bp         |
| JW1995                                                                                                                                                                                                                                                                                                  | 5'-<br>CCGCATTTCTTGGTTCACTCGTCAATTATAA<br>GAATACGATTGCGCTCGTAATCGATGAATTC<br>GAGCTCG -3'  | Reverse, with 50 nt downstream of <i>ASN2</i> stop codon, sequence homology to pBS34 (underlined)        | CN0033    |                  |
| <b>For verifying the success of introducing mCherry to <i>ASN2</i> in yeast genome (colocalization assay)</b><br>DNA template: genomic DNA isolated from selected yeast transformants                                                                                                                   |                                                                                           |                                                                                                          |           |                  |
| JW2041                                                                                                                                                                                                                                                                                                  | 5'- TTGATCCAAATGAAAAGATGATCAAG -3'                                                        | Forward, located at nt1301-1326 of <i>ASN2</i> coding sequence                                           | JW1775    | 1,154 bp         |
| JW1775                                                                                                                                                                                                                                                                                                  | 5'- CTAATTGTACAGCTCGTCCATGCC -3'                                                          | Reverse, located at nt688-711 of <i>mCherry</i> coding sequence                                          | JW2041    |                  |
| <b>For creating yeast <i>asn1Δ</i> (assembly dependence assay)</b><br>DNA cassette carrying (5' to 3'): 50 nt upstream of the <i>ASN1</i> start codon, hygromycin resistance gene, and 50 nt downstream of the <i>ASN1</i> stop codon<br>DNA template: pFA6a-hphMX6                                     |                                                                                           |                                                                                                          |           |                  |
| JW2201                                                                                                                                                                                                                                                                                                  | 5'-<br>AAAAGTATAACTTGCTTTACGCTAAGGATAT<br>AAATCGGACGTAACCTAAGGGTCGACGGAT<br>CCCCGGG -3'   | Forward, with 50 nt upstream of <i>ASN1</i> start codon, sequence homology to pFA6a-hphMX6 (underlined)  | JW2202    | 1,811 bp         |
| JW2202                                                                                                                                                                                                                                                                                                  | 5'-<br>AAATATCTATAAGATTAATCCATAATCTTTT<br>TCTATTTTTTAATGTTATATCGATGAATTCGA<br>GCTCG -3'   | Reverse, with 50 nt downstream of <i>ASN1</i> stop codon, sequence homology to pFA6a-hphMX6 (underlined) | JW2201    |                  |
| <b>For creating yeast <i>asn2Δ</i> (assembly dependence assay)</b><br>DNA cassette carrying (5' to 3'): 50 nt upstream of the <i>ASN2</i> start codon, hygromycin resistance gene, and 50 nt downstream of the <i>ASN2</i> stop codon<br>DNA template: pFA6a-hphMX6                                     |                                                                                           |                                                                                                          |           |                  |
| JW2193                                                                                                                                                                                                                                                                                                  | 5'-<br>TTGCTTCCCAGTTAAGCTCACCAAAACACAA<br>ATACTACTACAATAACAATGGTTCGACGGATC<br>CCCCGGG -3' | Forward, with 50 nt upstream of <i>ASN2</i> start codon, sequence homology to pFA6a-hphMX6 (underlined)  | JW2194    | 1,811 bp         |
| JW2194                                                                                                                                                                                                                                                                                                  | 5'-<br>CCGCATTTCTTGGTTCACTCGTCAATTATAA<br>GAATACGATTGCGCTCGTAATCGATGAATTC<br>GAGCTCG -3'  | Reverse, with 50 nt downstream of <i>ASN2</i> stop codon, sequence homology to pFA6a-hphMX6 (underlined) | JW2193    |                  |
| <b>For verifying the success of deleting <i>ASN1</i> and <i>ASN2</i> from yeast genome (assembly dependence assay)</b><br>DNA template: genomic DNA isolated from selected yeast transformants                                                                                                          |                                                                                           |                                                                                                          |           |                  |
| JW2010                                                                                                                                                                                                                                                                                                  | 5'- CTGCCCACTCGAGATGACAAATA -3'                                                           | Forward, located 200 nt upstream of <i>ASN1</i> start codon                                              | JW1986    | 1,355 bp         |
| JW1986                                                                                                                                                                                                                                                                                                  | 5'- CTCCATACAAGCCAACCACG -3'                                                              | Reverse, located at nt713-732 of hygromycin                                                              | JW2010    |                  |



| Primer Code                                                                                                                                                                                                                                                                                                                                                                  | Sequence (5' to 3')                                                                   | Description                                                                                                       | Used with | PCR Product Size |
|------------------------------------------------------------------------------------------------------------------------------------------------------------------------------------------------------------------------------------------------------------------------------------------------------------------------------------------------------------------------------|---------------------------------------------------------------------------------------|-------------------------------------------------------------------------------------------------------------------|-----------|------------------|
|                                                                                                                                                                                                                                                                                                                                                                              |                                                                                       | resistance coding sequence                                                                                        |           |                  |
| JW2009                                                                                                                                                                                                                                                                                                                                                                       | 5'- CATTGACTCATGGCAAGATTTCTCC -3'                                                     | Forward, located 200 nt upstream of <b>ASN2</b> start codon                                                       | JW1986    | 1,355 bp         |
| JW1986                                                                                                                                                                                                                                                                                                                                                                       | 5'- CTCCATACAAGCCAACCACG -3'                                                          | Reverse, located at nt713-732 of hygromycin resistance coding sequence                                            | JW2009    |                  |
| <b>For cloning ASN1 into pFA6a-GFP-kanMX6</b><br>DNA template: genomic DNA isolated from yeast BY4741                                                                                                                                                                                                                                                                        |                                                                                       |                                                                                                                   |           |                  |
| JW2022                                                                                                                                                                                                                                                                                                                                                                       | 5'- CTT <u>GTCGAC</u> ATGTGTGGTATTTTCGCCGCTTC -3'                                     | Forward, for cloning <b>ASN1</b> , <i>Sall</i> site underlined                                                    | JW2023    | 1,734 bp         |
| JW2023                                                                                                                                                                                                                                                                                                                                                                       | 5'- CTTCCCGGGTTCGATATGTTTTTCATGAATTGGGCATATC -3'                                      | Reverse, for cloning <b>ASN1</b> , <i>SmaI</i> site underlined                                                    | JW2022    |                  |
| <b>For site-directed mutagenesis of pFA6a-ASN1-GFP-kanMX6 (to introduce C1A or R344A mutation into ASN1 coding sequence)</b><br>DNA template: pFA6a-ASN1-GFP-kanMX6                                                                                                                                                                                                          |                                                                                       |                                                                                                                   |           |                  |
| JW2259                                                                                                                                                                                                                                                                                                                                                                       | 5'- GACGTTACCACTATCG <b>CAG</b> CTTCCA <b>CT</b> CCAATG -3'                           | Forward, with <b>R344A</b> mutation (in bold)                                                                     | JW2260    | 6,593 bp         |
| JW2260                                                                                                                                                                                                                                                                                                                                                                       | 5'- GTAAGTTTCCAAATGGTAGATCAC - 3'                                                     | Reverse                                                                                                           | JW2259    |                  |
| JW2261                                                                                                                                                                                                                                                                                                                                                                       | 5'- CTGCAGGTCGACATG <b>GCT</b> GGTATTTTCGCCGCT -3'                                    | Forward, with <b>C1A</b> mutation (in bold)                                                                       | JW2262    | 6,593 bp         |
| JW2262                                                                                                                                                                                                                                                                                                                                                                       | 5'- CGTACGAAGCTTCAGCTGG -3'                                                           | Reverse                                                                                                           | JW2261    |                  |
| <b>For making yeast ASN1(R344A)::GFP</b><br>DNA cassette carrying (5' to 3'): <b>ASN1</b> coding sequence (with R344A mutation), kanamycin resistance gene, and 50 nt downstream of the <b>ASN1</b> stop codon<br>DNA template: pFA6a-ASN1(R344A)-GFP-kanMX6                                                                                                                 |                                                                                       |                                                                                                                   |           |                  |
| JW2038                                                                                                                                                                                                                                                                                                                                                                       | 5'- CGCATTCTTCCACCCCAATAG -3'                                                         | Forward, located at nt601-622 of <b>ASN1</b> coding sequence                                                      | JW2160    | 3,590 bp         |
| JW2160                                                                                                                                                                                                                                                                                                                                                                       | 5'- AAATATCTATAAGATTAATCCATAATTCTTTTCTATTTTTTAATGTTATATCGATGAATTCCGA <u>GCTCG</u> -3' | Reverse, with 50 nt downstream of <b>ASN1</b> stop codon, sequence homology to pFA6a-ASN1-GFP-kanMX6 (underlined) | JW2038    |                  |
| <b>For making yeast ASN1(C1A)::GFP and yeast ASN1(C1A-R344A)::GFP</b><br>DNA cassette carrying (5' to 3'): 50 nt upstream of the <b>ASN1</b> start codon, <b>ASN1</b> coding sequence (with desired mutation), kanamycin resistance gene, and 50 nt downstream of the <b>ASN1</b> stop codon<br>DNA template: pFA6a-ASN1(C1A)-GFP-kanMX6 or pFA6a-ASN1(C1A-R344A)-GFP-kanMX6 |                                                                                       |                                                                                                                   |           |                  |
| JW2276                                                                                                                                                                                                                                                                                                                                                                       | 5'- AAAAGTATAACTTGCTTTACGCTAAGGATATAAATCGGACGTAAGTAAAGATGGCTGGTATTTCGCCGCT -3'        | Forward, with 50 nt upstream of <b>ASN1</b> start codon, start codon (italicized), <b>C1A</b> mutation (in bold)  | JW2160    | 4,240 bp         |
| JW2160                                                                                                                                                                                                                                                                                                                                                                       | 5'- AAATATCTATAAGATTAATCCATAATTCTTTTCTATTTTTTAATGTTATATCGATGAATTCCGA <u>GCTCG</u> -3' | Reverse, with 50 nt downstream of <b>ASN1</b> stop codon, sequence homology to pFA6a-ASN1-GFP-kanMX6 (underlined) | JW2276    |                  |
| <b>For preparing PCR products to send out for DNA sequencing</b><br>DNA template: genomic DNA isolated from yeast <b>ASN1(C1A)::GFP</b> , yeast <b>ASN1(R344A)::GFP</b> , and yeast <b>ASN1(C1A-R344A)::GFP</b>                                                                                                                                                              |                                                                                       |                                                                                                                   |           |                  |
| JW2010                                                                                                                                                                                                                                                                                                                                                                       | 5'- CTGCCCACTCGAGATGACAAATA -3'                                                       | Forward, located 200 nt upstream of <b>ASN1</b> start codon                                                       | JW1623    | 2,829 bp         |

| <b>Primer Code</b>        | <b>Sequence (5' to 3')</b>      | <b>Description</b>                                                                          | <b>Used with</b> | <b>PCR Product Size</b> |
|---------------------------|---------------------------------|---------------------------------------------------------------------------------------------|------------------|-------------------------|
| JW1623                    | 5'- GCGACCTCATACTATACCTG -3'    | Reverse, located 184 nt downstream of <b>GFP</b> coding sequence                            | JW2010           |                         |
| <b>For DNA sequencing</b> |                                 |                                                                                             |                  |                         |
| JW2010                    | 5'- CTGCCCACTCGAGATGACAAATA -3' | Forward, located 200 nt upstream of <b>ASN1</b> start codon                                 |                  |                         |
| JW2038                    | 5'- CGCATTCTTCCACCCCAATAG -3'   | Forward, located at nt601-622 of <b>ASN1</b> coding sequence                                |                  |                         |
| JW2039                    | 5'- ACATCGATCCAAATGAAAAGATG -3' | Forward, located at nt1301-1323 of <b>ASN1</b> coding sequence                              |                  |                         |
| JW1623                    | 5'- GCGACCTCATACTATACCTG -3'    | Reverse, located 184 nt downstream of <b>GFP</b> coding sequence (in pFA6a-ASN1-GFP-kanMX6) |                  |                         |
